# Supplementary material
Source: PubMed Central journal article supplement (PMC5562391)
Supplement: ct7b00479_si_001.pdf [file ct7b00479_si_001.pdf]

# **Water Multilayers on TiO<sub>2</sub> (101) Anatase Surface: Assessment of a DFTB-Based Method**

Daniele Selli,<sup>1</sup> Gianluca Fazio,<sup>1,2</sup> Gotthard Seifert,<sup>2</sup> Cristiana Di Valentin<sup>1\*</sup>

<sup>1</sup>Dipartimento di Scienza dei Materiali, Università di Milano-Bicocca, Milano Italy

<sup>2</sup>Technische Universität Dresden, Institut für Theoretische Chemie, D-01062 Dresden, Germany

## **SUPPORTING INFORMATION**

---

\* Corresponding author: [cristiana.divalentin@mater.unimib.it](mailto:cristiana.divalentin@mater.unimib.it)

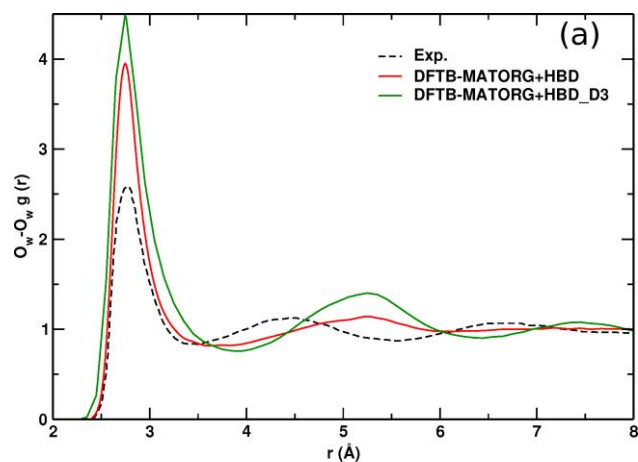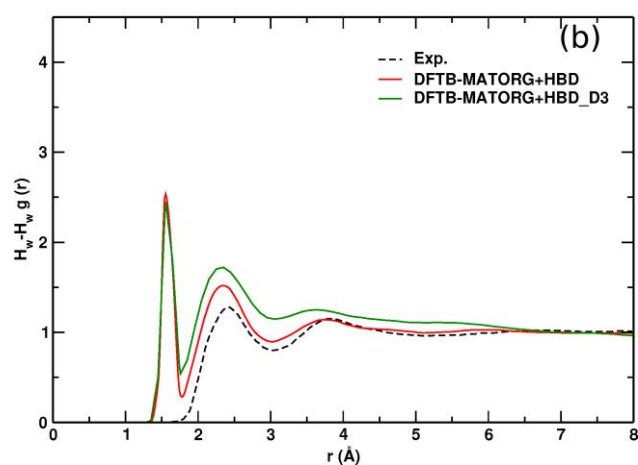

**Figure S1.** Comparison of the oxygen-oxygen ( $O_w-O_w$ , **a**) and hydrogen-hydrogen ( $H_w-H_w$ , **b**) radial distribution functions (RDF): dashed black line, experimental measurement; red line, DFTB-MATORG+HBD with the modified  $\gamma$  function for the H-bond; green line, DFTB-MATORG+HBD with the inclusion of the Grimme's D3 dispersion correction.

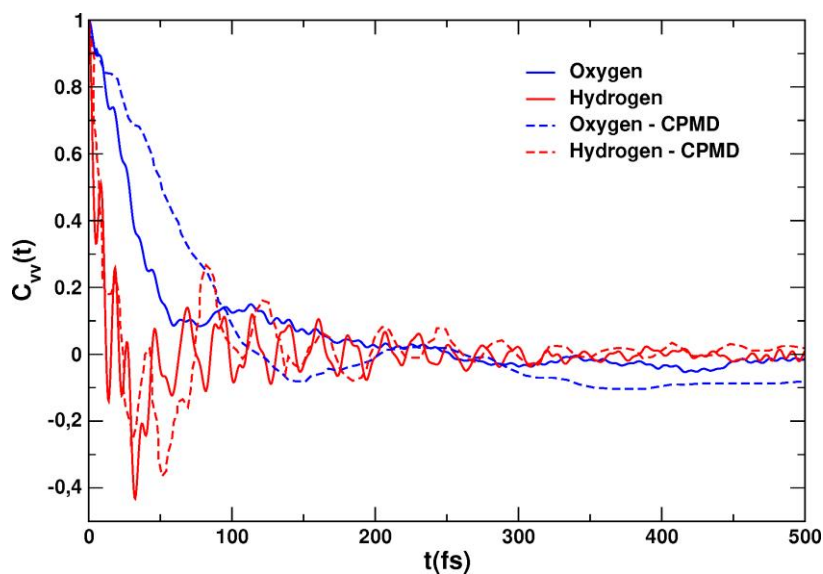

**Figure S2.** Comparison of the oxygen (blue, solid line) and hydrogen (red, solid line) velocity autocorrelation function ( $C_{vv}$ ) calculated with DFTB-MATORG+HBD, with the oxygen (blue, dashed line) and hydrogen (red, dashed line) ones calculated with CPMD from Ref. 1.

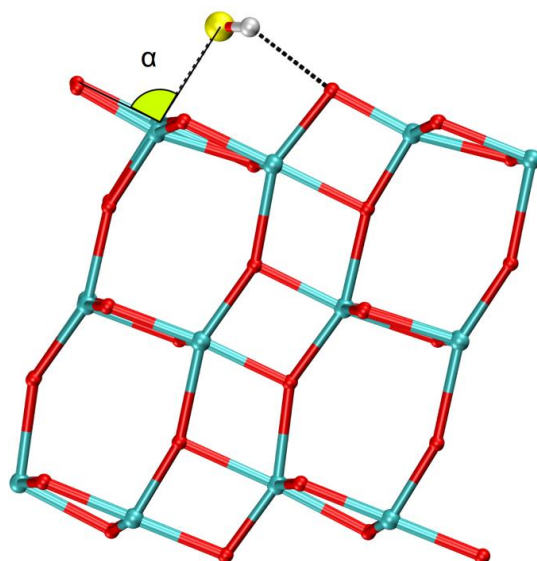

**Figure S3.** Definition of the bond angle  $\alpha$  between the water molecule and the (101) anatase slab.

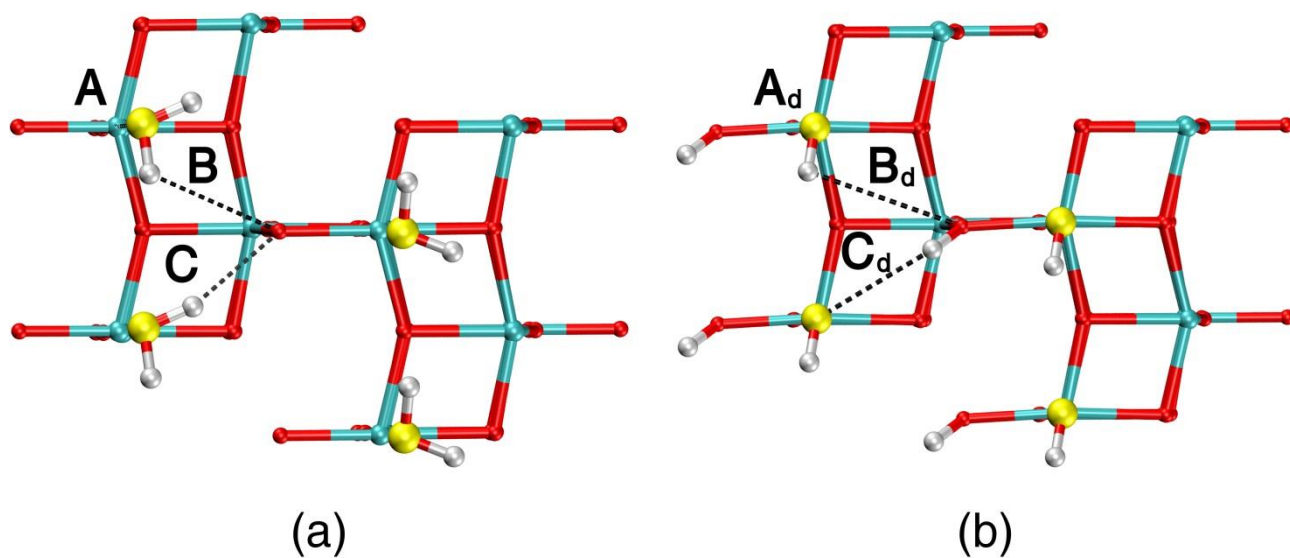

**Figure S4.** Molecular,  $\text{H}_2\text{O}$  (a) and dissociated,  $\text{OH}$ ,  $\text{H}$  (b) equilibrium structure in the full water coverage regime,  $\theta = 1$ . Values of bond distances are reported in the **Table S1**.

**Table S1.** Relevant interatomic distances (in Å) of the equilibrium structures of H<sub>2</sub>O (*Molecular Adsorption*, top panel) and OH, H (*Dissociative Adsorption*, bottom panel) on the (101) TiO<sub>2</sub> anatase slab, in the *full coverage regime* ( $\theta = 1$ ) as obtained with DFTB and DFT methods. H is the hydrogen atom of the OH group bound to the Ti atom, whereas H\* is the hydrogen atom bound to the bridging O<sub>2c</sub> atom. These geometrical parameters are graphically defined in **Figure S3** and **Figure S4**. The absolute error reported in parenthesis for DFTB data is calculated with respect to the PBE value.

| <i>Molecular Adsorption</i>    |                                             |                                             |                                 |              |
|--------------------------------|---------------------------------------------|---------------------------------------------|---------------------------------|--------------|
| Method                         | Ti <sub>5c</sub> – OH <sub>2</sub><br>A (Å) | H ... O <sub>2c</sub><br>B (Å)              | H ... O <sub>2c</sub><br>C (Å)  | $\alpha$ (°) |
| DFTB-MATSCI                    | 2.46 (+0.08)                                | 2.11 (–0.89)                                | 2.11 (–0.23)                    | 104.8°       |
| DFTB-MATORG+HBD                | 2.41 (+0.03)                                | 2.14 (–0.86)                                | 2.15 (–0.19)                    | 105.2°       |
| DFT-PBE                        | 2.38                                        | 3.00                                        | 2.34                            | 93.0°        |
| <i>Dissociative Adsorption</i> |                                             |                                             |                                 |              |
| Method                         | Ti <sub>5c</sub> – OH<br>A <sub>d</sub> (Å) | H ... O <sub>2c</sub><br>B <sub>d</sub> (Å) | H* ... OH<br>C <sub>d</sub> (Å) |              |
| DFTB-MATSCI                    | 1.91 (+0.05)                                | 3.48 (+0.18)                                | 2.65 (–0.06)                    |              |
| DFTB-MATORG+HBD                | 1.92 (+0.06)                                | 3.94 (+0.64)                                | 3.10 (+0.39)                    |              |
| DFT-PBE                        | 1.86                                        | 3.30                                        | 2.71                            |              |

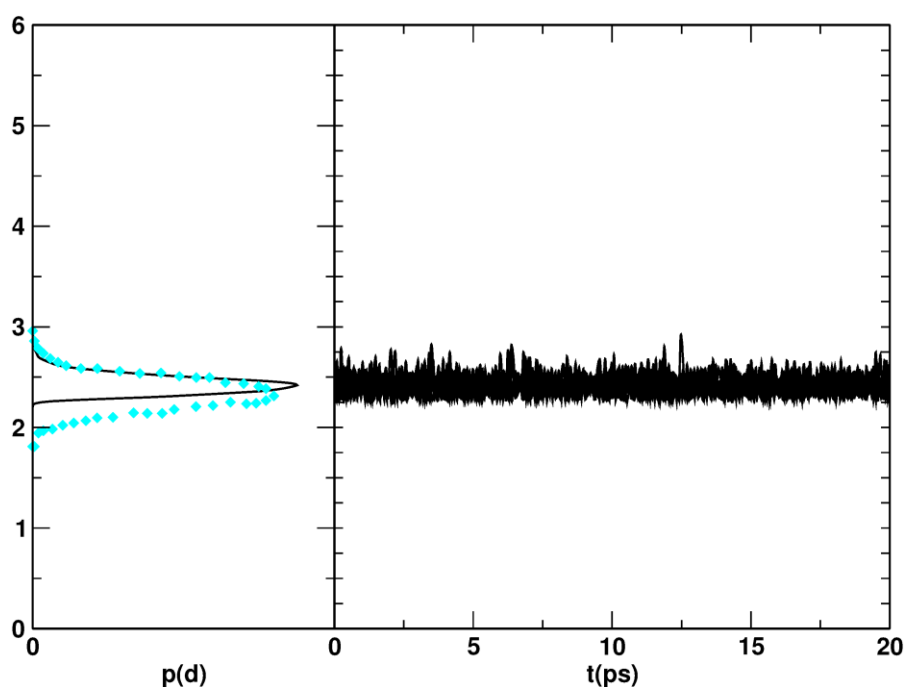

**Figure S5.** MATORG+HBD and DFT/PBE distribution  $p(d)$  and time evolution  $d(t)$  of the Ti – O Euclidean distances between the water molecule (O atoms) of the monolayer and the titania surface (Ti<sub>5c</sub> atoms). The DFT Car-Parrinello corresponding distribution  $p(d)$  in cyan diamonds is obtained adapting the data from ref. 2 with trigonometric transformations, assuming that the  $\alpha$  angle, as defined in **Figure S1**, is on average that of the static PBE calculations.

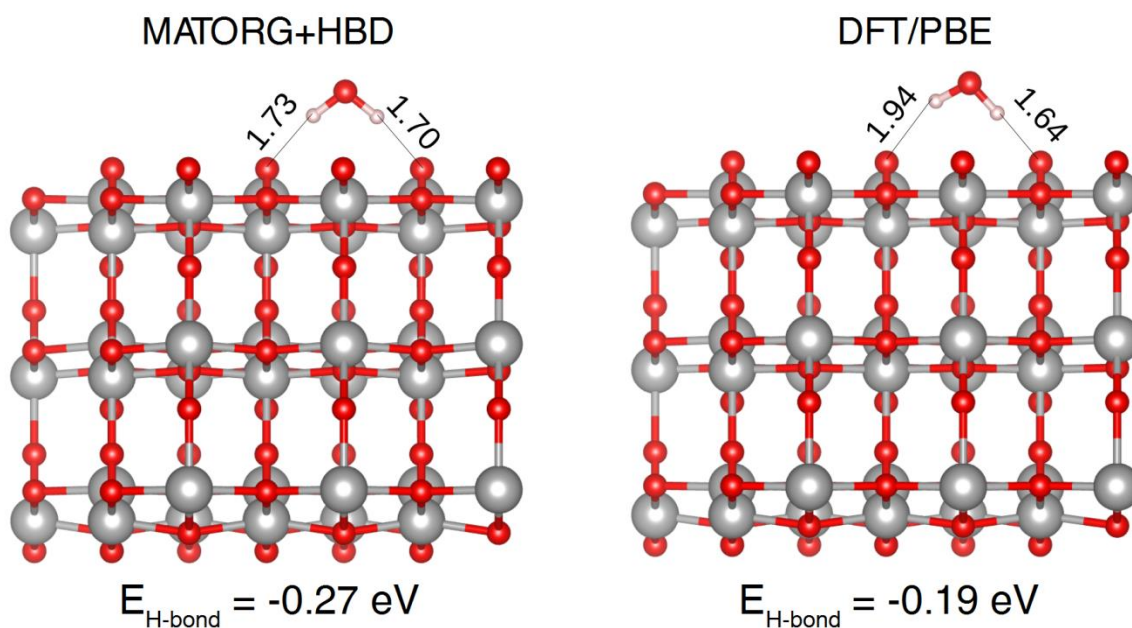

**Figure S6.** MATORG+HBD and DFT/PBE (101) anatase slab with a single water molecule in the same position as the second layer water molecules of the BL2 bilayer. Relevant H-bond distances are also given. The strength of the H-bond has been estimated with single-point calculations of these structure and the isolated systems.

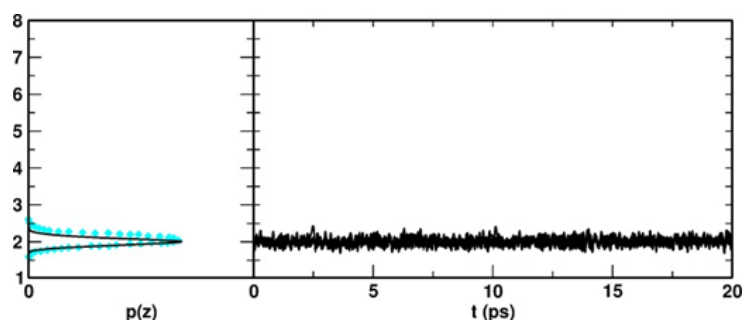

**Figure S7.** MATSCI ML Distribution  $p(z)$  and time evolution  $z(t)$  of the perpendicular distances between the water molecule (O atoms) of the water monolayer and the titania surface ( $\text{Ti}_{5c}$  atoms). The DFT Car-Parrinello corresponding distribution  $p(z)$  is reported in cyan diamonds.<sup>2</sup>

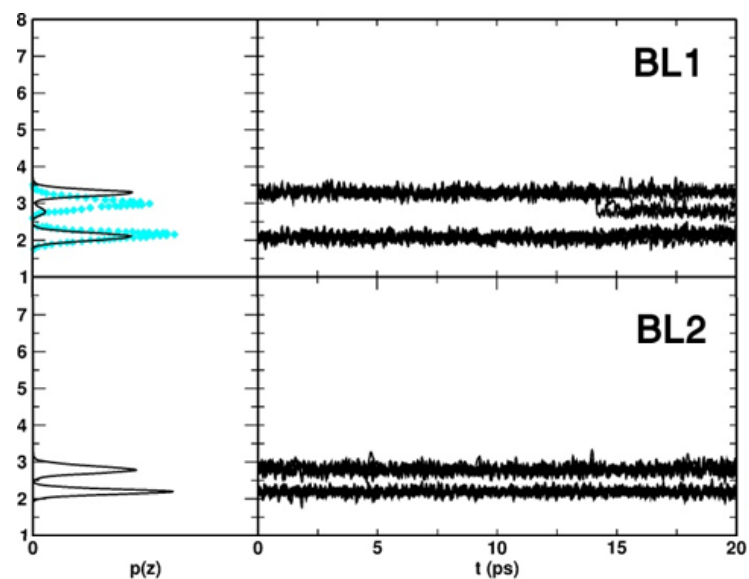

**Figure S8.** MATSCI BL1 and BL2 distribution  $p(z)$  and time evolution  $z(t)$  of the perpendicular distances between the water molecule (O atoms) and the titania surface ( $\text{Ti}_{5c}$  atoms). The DFT (PBE) Car-Parrinello corresponding distribution  $p(z)$  is reported in cyan diamonds.<sup>2</sup>

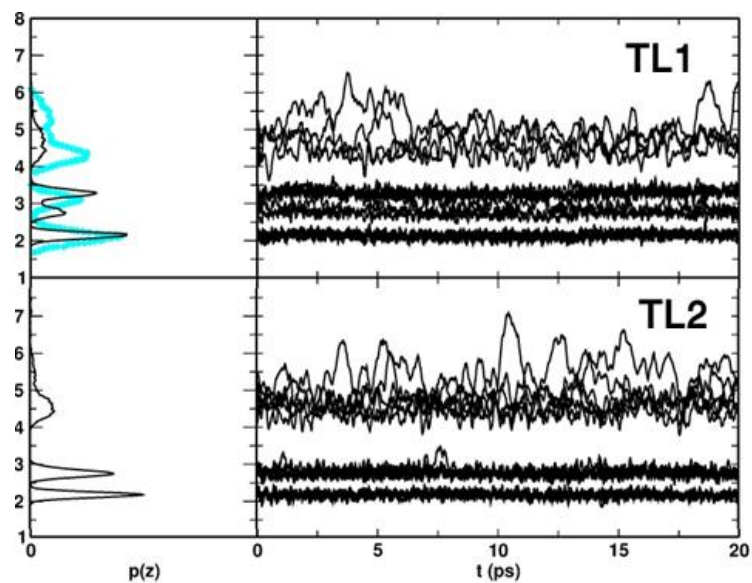

**Figure S9.** MATSCI TL1 and TL2 Distribution  $p(z)$  and time evolution  $z(t)$  of the perpendicular distances between the water molecule (O atoms) and the titania surface ( $\text{Ti}_{5c}$  atoms). The DFT Car-Parrinello corresponding distribution  $p(z)$  is reported in cyan diamonds.<sup>2</sup>

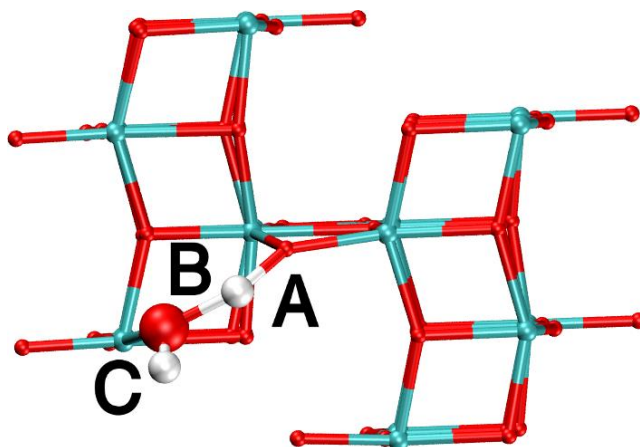

**Figure S10.** DFTB optimized structure of the transition state for the process of water dissociation (coverage  $\theta = 0.25$ ). Values of bond distances are reported in the **Table S2**.

**Table S2.** Geometrical parameters, as defined graphically in **Figure S10**, for the transition state structure of water dissociation on the (101) anatase slab model with the DFTB methods and in the DFT reference.<sup>3,4</sup>

|              | <b>A</b> | <b>B</b> | <b>C</b> |
|--------------|----------|----------|----------|
| MATSCI       | 1.34     | 1.44     | 2.27     |
| MATORG+HBD   | 1.15     | 1.48     | 2.25     |
| DFT-B3LYP-D* | 1.18     | 1.35     | 2.06     |

<sup>1</sup> Kühne, T. D.; Krack, M.; Parrinello M. Static and Dynamical Properties of Liquid Water from First Principles by a Novel Car-Parrinello-like Approach *J. Chem. Theory Comput.* **2009**, *5*, 235–241.

<sup>2</sup> Tilocca, A.; Selloni, A. *J. Phys. Chem. C* **2012**, *116*, 9114–9121.

<sup>3</sup> Ferrighi, L.; Datteo, M.; Fazio, G.; Di Valentin, C. *J. Am. Chem. Soc.* **2016**, *138*, 7365 – 7376.

<sup>4</sup> These values have been calculated using the methods and the procedures employed in Ref. 3 to determine the transition structure of a similar reaction barrier.
